# Supplementary material for: Expanding the Understanding of Biases in Development of Clinical-Grade Molecular Signatures: A Case Study in Acute Respiratory Viral Infections
Source: PubMed Central journal article supplement (PMC3105991; doi:10.1371/journal.pone.0020662), 2011-06-01
Supplement: pone.0020662.s005.pdf [file pone.0020662.s005.pdf]

**Table S1:** The complete list of genes participating in the 3,473 non-redundant and maximally predictive molecular signatures discovered by the TIE\* algorithm in the data of Zaas *et al.* [1] for discriminating symptomatic from uninfected samples.

| <i>Probe set ID</i> | <i>Gene symbol</i>    | <i>Gene name</i>                                                                                             | <i>Percentage of signatures participated in</i> |
|---------------------|-----------------------|--------------------------------------------------------------------------------------------------------------|-------------------------------------------------|
| 201065_s_at         | <b>GTF2I</b>          | general transcription factor Iii                                                                             | 72.93%                                          |
| 213674_x_at         | <b>IGHD</b>           | immunoglobulin heavy constant delta                                                                          | 72.53%                                          |
| 214511_x_at         | <b>FCGR1B</b>         | Fc fragment of IgG, high affinity Ib, receptor (CD64)                                                        | 72.01%                                          |
| 207826_s_at         | <b>ID3</b>            | inhibitor of DNA binding 3, dominant negative helix-loop-helix protein                                       | 71.41%                                          |
| 213797_at           | <b>RSAD2</b>          | radical S-adenosyl methionine domain containing 2                                                            | 70.66%                                          |
| 217418_x_at         | <b>MS4A1</b>          | membrane-spanning 4-domains, subfamily A, member 1                                                           | 69.80%                                          |
| 219471_at           | <b>C13orf18</b>       | chromosome 13 open reading frame 18                                                                          | 69.39%                                          |
| 219112_at           | <b>RAPGEF6</b>        | Rap guanine nucleotide exchange factor (GEF) 6                                                               | 63.29%                                          |
| 219073_s_at         | <b>OSBPL10</b>        | oxysterol binding protein-like 10                                                                            | 58.71%                                          |
| 219313_at           | <b>GRAMD1C</b>        | GRAM domain containing 1C                                                                                    | 56.29%                                          |
| 204439_at           | <b>IFI44L</b>         | interferon-induced protein 44-like                                                                           | 42.38%                                          |
| 221234_s_at         | <b>BACH2</b>          | BTB and CNC homology 1, basic leucine zipper transcription factor 2                                          | 28.76%                                          |
| 216950_s_at         | <b>FCGR1A, FCGR1C</b> | Fc fragment of IgG, high affinity Ia, receptor (CD64); Fc fragment of IgG, high affinity Ic, receptor (CD64) | 27.99%                                          |
| 207431_s_at         | <b>DEGS1</b>          | degenerative spermatocyte homolog 1, lipid desaturase (Drosophila)                                           | 25.37%                                          |
| 205049_s_at         | <b>CD79A</b>          | CD79a molecule, immunoglobulin-associated alpha                                                              | 23.73%                                          |
| 202723_s_at         | <b>FOXO1</b>          | forkhead box O1                                                                                              | 22.40%                                          |
| 44790_s_at          | <b>C13orf18</b>       | chromosome 13 open reading frame 18                                                                          | 21.83%                                          |
| 203413_at           | <b>NELL2</b>          | NEL-like 2 (chicken)                                                                                         | 19.95%                                          |
| 214059_at           | <b>IFI44</b>          | Interferon-induced protein 44                                                                                | 19.55%                                          |
| 206025_s_at         | <b>TNFAIP6</b>        | tumor necrosis factor, alpha-induced protein 6                                                               | 19.00%                                          |
| 204747_at           | <b>IFIT3</b>          | interferon-induced protein with tetratricopeptide repeats 3                                                  | 18.40%                                          |
| 218578_at           | <b>CDC73</b>          | cell division cycle 73, Paf1/RNA polymerase II complex component, homolog (S. cerevisiae)                    | 15.38%                                          |
| 207180_s_at         | <b>HTATIP2</b>        | HIV-1 Tat interactive protein 2, 30kDa                                                                       | 12.44%                                          |
| 210448_s_at         | <b>P2RX5</b>          | purinergic receptor P2X, ligand-gated ion channel, 5                                                         | 9.79%                                           |
| 208901_s_at         | <b>TOP1</b>           | topoisomerase (DNA) I                                                                                        | 9.39%                                           |
| 210356_x_at         | <b>MS4A1</b>          | membrane-spanning 4-domains, subfamily A, member 1                                                           | 9.39%                                           |
| 203153_at           | <b>IFIT1</b>          | interferon-induced protein with tetratricopeptide repeats 1                                                  | 8.49%                                           |
| 205552_s_at         | <b>OAS1</b>           | 2',5'-oligoadenylate synthetase 1, 40/46kDa                                                                  | 8.49%                                           |
| 217719_at           | <b>EIF3L</b>          | eukaryotic translation initiation factor 3, subunit L                                                        | 8.12%                                           |
| 219452_at           | <b>DPEP2</b>          | dipeptidase 2                                                                                                | 6.74%                                           |
| 202086_at           | <b>MX1</b>            | myxovirus (influenza virus) resistance 1, interferon-inducible protein p78 (mouse)                           | 6.62%                                           |
| 209582_s_at         | <b>CD200</b>          | CD200 molecule                                                                                               | 5.01%                                           |
| 208975_s_at         | <b>KPNB1</b>          | karyopherin (importin) beta 1                                                                                | 4.06%                                           |
| 208436_s_at         | <b>IRF7</b>           | interferon regulatory factor 7                                                                               | 3.80%                                           |
| 205483_s_at         | <b>ISG15</b>          | ISG15 ubiquitin-like modifier                                                                                | 2.07%                                           |
| 200689_x_at         | <b>EEF1G</b>          | eukaryotic translation elongation factor 1 gamma                                                             | 1.99%                                           |
| 209185_s_at         | <b>IRS2</b>           | insulin receptor substrate 2                                                                                 | 1.76%                                           |
| 215621_s_at         | <b>IGHD</b>           | immunoglobulin heavy constant delta                                                                          | 1.64%                                           |
| 210817_s_at         | <b>CALCOCO2</b>       | calcium binding and coiled-coil domain 2                                                                     | 1.47%                                           |
| 202748_at           | <b>GBP2</b>           | guanylate binding protein 2, interferon-inducible                                                            | 1.41%                                           |
| 219394_at           | <b>PGS1</b>           | phosphatidylglycerophosphate synthase 1                                                                      | 1.07%                                           |

Genes highlighted in bold are those that also comprised the 12-gene panviral signature developed by Statnikov *et al.* [2] by applying GLL on the entire set of samples.

Continued on the next page

**Table S1:** Continued from the previous page.

| <i>Probe set ID</i> | <i>Gene symbol</i> | <i>Gene name</i>                                                                  | <i>Percentage of signatures participated in</i> |
|---------------------|--------------------|-----------------------------------------------------------------------------------|-------------------------------------------------|
| 217986_s_at         | <i>BAZIA</i>       | bromodomain adjacent to zinc finger domain, 1A                                    | 0.98%                                           |
| 204972_at           | <i>OAS2</i>        | 2'-5'-oligoadenylate synthetase 2, 69/71kDa                                       | 0.66%                                           |
| 203038_at           | <i>PTPRK</i>       | protein tyrosine phosphatase, receptor type, K                                    | 0.37%                                           |
| 203939_at           | <i>NT5E</i>        | 5'-nucleotidase, ecto (CD73)                                                      | 0.35%                                           |
| 205660_at           | <i>OASL</i>        | 2'-5'-oligoadenylate synthetase-like                                              | 0.32%                                           |
| 220179_at           | <i>DPEP3</i>       | dipeptidase 3                                                                     | 0.32%                                           |
| 202100_at           | <i>RALB</i>        | v-ral simian leukemia viral oncogene homolog B (ras related; GTP binding protein) | 0.26%                                           |
| 204423_at           | <i>MKLN1</i>       | muskelin 1, intracellular mediator containing kelch motifs                        | 0.26%                                           |
| 212821_at           | <i>PLEKHG3</i>     | pleckstrin homology domain containing, family G (with RhoGef domain) member 3     | 0.23%                                           |
| 201739_at           | <i>SGK1</i>        | serum/glucocorticoid regulated kinase 1                                           | 0.03%                                           |
| 204581_at           | <i>CD22</i>        | CD22 molecule                                                                     | 0.03%                                           |
| 206420_at           | <i>IGSF6</i>       | immunoglobulin superfamily, member 6                                              | 0.03%                                           |
| 209417_s_at         | <i>IFI35</i>       | interferon-induced protein 35                                                     | 0.03%                                           |
| 218543_s_at         | <i>PARP12</i>      | poly (ADP-ribose) polymerase family, member 12                                    | 0.03%                                           |
| 219211_at           | <i>USP18</i>       | ubiquitin specific peptidase 18                                                   | 0.03%                                           |
| 219364_at           | <i>DHX58</i>       | DEXH (Asp-Glu-X-His) box polypeptide 58                                           | 0.03%                                           |
| 219700_at           | <i>PLXDC1</i>      | plexin domain containing 1                                                        | 0.03%                                           |
| 219863_at           | <i>HERC5</i>       | hect domain and RLD 5                                                             | 0.03%                                           |
| 221239_s_at         | <i>FCRL2</i>       | Fc receptor-like 2                                                                | 0.03%                                           |

## References

1. Zaas AK, Chen M, Varkey J, Veldman T, Hero AO, III, Lucas J, Huang Y, Turner R, Gilbert A, Lambkin-Williams R, Oien NC, Nicholson B, Kingsmore S, Carin L, Woods CW, Ginsburg GS (2009) Gene expression signatures diagnose influenza and other symptomatic respiratory viral infections in humans. *Cell Host Microbe* 6: 207-217.
2. Statnikov A, McVoy L, Lytkin N, Aliferis CF (2010) Improving development of the molecular signature for diagnosis of acute respiratory viral infections. *Cell Host Microbe* 7: 100-101.
