# Supplementary material for: Expanding the Understanding of Biases in Development of Clinical-Grade Molecular Signatures: A Case Study in Acute Respiratory Viral Infections
Source: PubMed Central journal article supplement (PMC3105991; doi:10.1371/journal.pone.0020662), 2011-06-01
Supplement: pone.0020662.s006.pdf [file pone.0020662.s006.pdf]

**Table S2:** The complete list of genes participating in the 2,922 non-redundant and maximally predictive molecular signatures discovered by TIE\* in the data of Zaas *et al.* [1] for discriminating between Candidemia-infected samples and healthy controls.

| <i>Probe set ID</i> | <i>Gene symbol</i>                                      | <i>Gene title</i>                                                                          | <i>Percentage of signatures participated in</i> |
|---------------------|---------------------------------------------------------|--------------------------------------------------------------------------------------------|-------------------------------------------------|
| 1420330_at          | <b><i>Clec4e</i></b>                                    | C-type lectin domain family 4, member e                                                    | 100.00%                                         |
| 1424132_at          | <b><i>Hras1</i></b>                                     | Harvey rat sarcoma virus oncogene 1                                                        | 100.00%                                         |
| 1427747_a_at        | <b><i>Lcn2</i></b>                                      | lipocalin 2                                                                                | 100.00%                                         |
| 1417293_at          | <b><i>Hs6st1</i></b> ///<br><b><i>LOC100047260</i></b>  | heparan sulfate 6-O-sulfotransferase 1 /// similar to heparan sulfate 6-sulfotransferase 1 | 73.51%                                          |
| 1426739_at          | <b><i>Donson</i></b>                                    | downstream neighbor of SON                                                                 | 72.25%                                          |
| 1427011_a_at        | <b><i>Lancl1</i></b>                                    | LanC (bacterial lantibiotic synthetase component C)-like 1                                 | 71.42%                                          |
| 1427925_at          | <b><i>Stx17</i></b>                                     | syntaxin 17                                                                                | 71.36%                                          |
| 1452197_at          | <b><i>Smc4</i></b>                                      | structural maintenance of chromosomes 4                                                    | 71.01%                                          |
| 1428357_at          | <b><i>2610019F03Rik</i></b>                             | RIKEN cDNA 2610019F03 gene                                                                 | 70.71%                                          |
| 1416378_at          | <b><i>Pnkp</i></b>                                      | polynucleotide kinase 3'-phosphatase                                                       | 69.75%                                          |
| 1452504_s_at        | <b><i>Ctbs</i></b>                                      | chitinase, di-N-acetyl-                                                                    | 66.80%                                          |
| 1417933_at          | <b><i>Igfbp6</i></b>                                    | insulin-like growth factor binding protein 6                                               | 56.71%                                          |
| 1422438_at          | <b><i>Ephx1</i></b>                                     | epoxide hydrolase 1, microsomal                                                            | 52.05%                                          |
| 1416524_at          | <b><i>Spop</i></b>                                      | speckle-type POZ protein                                                                   | 46.68%                                          |
| 1418012_at          | <b><i>Sh3glb1</i></b>                                   | SH3-domain GRB2-like B1 (endophilin)                                                       | 41.75%                                          |
| 1424754_at          | <b><i>Ms4a7</i></b>                                     | membrane-spanning 4-domains, subfamily A, member 7                                         | 33.85%                                          |
| 1427030_at          | <b><i>Ccdc52</i></b>                                    | coiled-coil domain containing 52                                                           | 33.57%                                          |
| 1429800_at          | <b><i>9130221H12Rik</i></b> ///<br><b><i>Zfp526</i></b> | RIKEN cDNA 9130221H12 gene /// zinc finger protein 526                                     | 32.58%                                          |
| 1416988_at          | <b><i>Msh2</i></b>                                      | mutS homolog 2 (E. coli)                                                                   | 32.27%                                          |
| 1451092_a_at        | <b><i>Rangap1</i></b>                                   | RAN GTPase activating protein 1                                                            | 29.23%                                          |
| 1417164_at          | <b><i>Dusp10</i></b>                                    | dual specificity phosphatase 10                                                            | 20.91%                                          |
| 1423466_at          | <b><i>Ccr7</i></b>                                      | chemokine (C-C motif) receptor 7                                                           | 20.84%                                          |
| 1454722_at          | <b><i>Pten</i></b>                                      | phosphatase and tensin homolog                                                             | 18.24%                                          |
| 1448361_at          | <b><i>Ttc3</i></b>                                      | tetratricopeptide repeat domain 3                                                          | 16.91%                                          |
| 1460551_at          | <b><i>Ran</i></b>                                       | RAN, member RAS oncogene family                                                            | 16.77%                                          |
| 1416226_at          | <b><i>Arpc1b</i></b>                                    | actin related protein 2/3 complex, subunit 1B                                              | 14.82%                                          |
| 1449945_at          | <b><i>Ppargc1b</i></b>                                  | peroxisome proliferative activated receptor, gamma, coactivator 1 beta                     | 11.33%                                          |
| 1416359_at          | <b><i>Snx18</i></b>                                     | sorting nexin 18                                                                           | 7.91%                                           |
| 1448129_at          | <b><i>Arpc5</i></b>                                     | actin related protein 2/3 complex, subunit 5                                               | 7.73%                                           |
| 1424369_at          | <b><i>Psmf1</i></b>                                     | proteasome (prosome, macropain) inhibitor subunit 1                                        | 5.30%                                           |
| 1423371_at          | <b><i>Pole4</i></b>                                     | polymerase (DNA-directed), epsilon 4 (p12 subunit)                                         | 5.13%                                           |
| 1419833_s_at        | <b><i>Arap3</i></b>                                     | ArfGAP with RhoGAP domain, ankyrin repeat and PH domain 3                                  | 3.87%                                           |
| 1418396_at          | <b><i>Gpsm3</i></b>                                     | G-protein signalling modulator 3 (AGS3-like, <i>C. elegans</i> )                           | 2.67%                                           |
| 1423539_at          | <b><i>Pms2</i></b>                                      | postmeiotic segregation increased 2 ( <i>S. cerevisiae</i> )                               | 2.67%                                           |
| 1416759_at          | <b><i>Mical1</i></b>                                    | microtubule associated monooxygenase, calponin and LIM domain containing 1                 | 2.22%                                           |
| 1422637_at          | <b><i>Rassf5</i></b>                                    | Ras association (RalGDS/AF-6) domain family member 5                                       | 2.22%                                           |
| 1434998_at          | <b><i>Iqgap1</i></b>                                    | IQ motif containing GTPase activating protein 1                                            | 2.22%                                           |
| 1416629_at          | <b><i>Slc1a5</i></b>                                    | solute carrier family 1 (neutral amino acid transporter), member 5                         | 1.81%                                           |
| 1460436_at          | <b><i>Ndst1</i></b>                                     | N-deacetylase/N-sulfotransferase (heparan glucosaminyl) 1                                  | 1.27%                                           |
| 1433507_a_at        | <b><i>Hmgn2</i></b>                                     | high mobility group nucleosomal binding domain 2                                           | 1.10%                                           |

Genes highlighted in bold are those that also comprised a 14-gene signature developed by applying GLL in the same data.

Continued on the next page

**Table S2:** Continued from the previous page.

| <i>Probe set ID</i> | <i>Gene symbol</i>                  | <i>Gene title</i>                                                                         | <i>Percentage of signatures participated in</i> |
|---------------------|-------------------------------------|-------------------------------------------------------------------------------------------|-------------------------------------------------|
| 1418634_at          | <i>Notch1</i>                       | Notch gene homolog 1 (Drosophila)                                                         | 1.06%                                           |
| 1449883_at          | <i>Fxyd2</i>                        | FXYD domain-containing ion transport regulator 2                                          | 1.06%                                           |
| 1436180_at          | <i>Dnajc5</i>                       | DnaJ (Hsp40) homolog, subfamily C, member 5                                               | 0.62%                                           |
| 1419810_x_at        | <i>Arhgap9</i>                      | Rho GTPase activating protein 9                                                           | 0.41%                                           |
| 1421038_a_at        | <i>Kcnn4</i>                        | potassium intermediate/small conductance calcium-activated channel, subfamily N, member 4 | 0.41%                                           |
| 1424526_a_at        | <i>Tgds</i>                         | TDP-glucose 4,6-dehydratase                                                               | 0.41%                                           |
| 1436838_x_at        | <i>Cot11</i>                        | coactosin-like 1 (Dictyostelium)                                                          | 0.41%                                           |
| 1448407_at          | <i>4632428N05Rik</i>                | RIKEN cDNA 4632428N05 gene                                                                | 0.41%                                           |
| 1449111_a_at        | <i>Grb2</i>                         | growth factor receptor bound protein 2                                                    | 0.41%                                           |
| 1434561_at          | <i>Asxl1</i>                        | additional sex combs like 1 (Drosophila)                                                  | 0.38%                                           |
| 1426212_s_at        | <i>Tmem161a</i>                     | transmembrane protein 161A                                                                | 0.34%                                           |
| 1437773_x_at        | <i>Ddx17</i>                        | DEAD (Asp-Glu-Ala-Asp) box polypeptide 17                                                 | 0.34%                                           |
| 1419731_at          | <i>Cyp2b19</i>                      | cytochrome P450, family 2, subfamily b, polypeptide 19                                    | 0.31%                                           |
| 1428736_at          | <i>Gramd3</i>                       | GRAM domain containing 3                                                                  | 0.31%                                           |
| 1451125_at          | <i>Paip2b</i>                       | poly(A) binding protein interacting protein 2B                                            | 0.31%                                           |
| 1417171_at          | <i>Itk</i>                          | IL2-inducible T-cell kinase                                                               | 0.03%                                           |
| 1417597_at          | <i>Cd28</i>                         | CD28 antigen                                                                              | 0.03%                                           |
| 1418468_at          | <i>Anxa11 /// Gm2260 /// Gm2274</i> | annexin A11 /// predicted gene 2260 /// predicted gene 2274                               | 0.03%                                           |
| 1419193_a_at        | <i>Gmfg</i>                         | glia maturation factor, gamma                                                             | 0.03%                                           |
| 1423150_at          | <i>Scg5</i>                         | secretogranin V                                                                           | 0.03%                                           |
| 1423897_at          | <i>Rnf187</i>                       | ring finger protein 187                                                                   | 0.03%                                           |
| 1424168_a_at        | <i>Capzb</i>                        | capping protein (actin filament) muscle Z-line, beta                                      | 0.03%                                           |
| 1427108_at          | <i>9530068E07Rik</i>                | RIKEN cDNA 9530068E07 gene                                                                | 0.03%                                           |
| 1451181_at          | <i>Tmem121</i>                      | transmembrane protein 121                                                                 | 0.03%                                           |
| 1460555_at          | <i>Fam65b</i>                       | family with sequence similarity 65, member B                                              | 0.03%                                           |

## References

1. Zaas AK, Aziz H, Lucas J, Perfect JR, Ginsburg GS (2010) Blood gene expression signatures predict invasive candidiasis. *Sci Transl Med* 2: 21ra17.
